### Use of mechanical pulmonary reperfusion and fibrinolysis in acute massive pulmonary embolism requiring extracorporeal membrane oxygenation support: a systematic review and meta-analysis

R. Chopard<sup>1</sup>, P. Nielsen<sup>2</sup>, F. Ius<sup>3</sup>, H. Pilichowski<sup>1</sup>, N. Meneveau<sup>1</sup>

<sup>1</sup>University Hospital of Besancon, Besancon, France; <sup>2</sup>Aalborg University Hospital, Aalborg, Denmark; <sup>3</sup>Hannover Medical School, Hannover, Germany

**Funding Acknowledgement:** Type of funding sources: None.

**Background and objectives:** The optimal pulmonary revascularization strategy in acute massive pulmonary embolism (PE) requiring the implantation extra corporeal membrane oxygenation remains controversial, and data are sparse.

**Methods:** We conducted a systematic review and meta-analysis of available evidence regarding the use of mechanical reperfusion (i.e. surgical or catheter-based embolectomy) and fibrinolytic strategies (i.e. systemic fibrinolysis, catheter-directed fibrinolysis, or as stand-alone therapy) in terms of mortality and bleeding outcomes.

**Results:** The literature search identified 835 studies, 17 of which were included or a total of 321 PE patients with ECMO. In total, 31.1% were treated with mechanical pulmonary reperfusion, while 78.9% received fibrinolytic strategies. The mortality rate was 23.0% in the mechanical reperfusion group and 43.1% in the fibrinolysis group (Figure). The pooled OR for mortality with mechanical reperfusion was 0.46 (95% CI, 0.213–0.997; I<sup>2</sup>=28.3%) versus fibrinolysis. The rate of bleeding in PE patients under ECMO was 29.1% in the mechanical reperfusion group and 26.0% in the fibrinolytic reperfusion (OR, 1.09; 95% CI, 0.46–2.54; I<sup>2</sup>=0.0%) among 10 eligible studies with available bleeding data. The meta-regression model did not identify any relationship between the covariates “more than one pulmonary reperfusion therapy” and “ECMO implantation before pulmonary reperfusion therapy”, and outcomes.

**Conclusions:** The results of the present meta-analysis and meta-regression suggest that surgical embolectomy yields the best results, regardless of the timing of VA-ECMO implantation in the reperfusion timeline, and regardless of whether fibrinolysis has been administered or not.

| Study name        | Mortality / Total |             |             |         |         |          | Mechanical reperfusion strategy | Fibrinolytic reperfusion strategy |
|-------------------|-------------------|-------------|-------------|---------|---------|----------|---------------------------------|-----------------------------------|
|                   | Odds ratio        | Lower limit | Upper limit | Z-Value | p-Value | p-Value  |                                 |                                   |
| Al-Bawardy (2018) | 0.800             | 0.076       | 8.474       | -0.185  | 0.853   | 2 / 4    | 5 / 9                           |                                   |
| Corsi (2017)      | 1.600             | 0.168       | 15.273      | 0.408   | 0.683   | 2 / 4    | 5 / 13                          |                                   |
| Dolmatova (2017)  | 0.333             | 0.009       | 12.815      | -0.590  | 0.555   | 0 / 1    | 2 / 4                           |                                   |
| George (2018)     | 4.000             | 0.612       | 26.123      | 1.448   | 0.148   | 4 / 6    | 9 / 27                          |                                   |
| Goreishi (2019)   | 0.855             | 0.032       | 22.551      | -0.094  | 0.925   | 0 / 11   | 1 / 30                          |                                   |
| Ius (2019)        | 0.024             | 0.002       | 0.232       | -3.220  | 0.001   | 1 / 20   | 11 / 16                         |                                   |
| Kjaergaard (2019) | 0.733             | 0.068       | 7.951       | -0.255  | 0.799   | 1 / 4    | 10 / 32                         |                                   |
| Luna-Lopez (2019) | 0.250             | 0.017       | 3.770       | -1.001  | 0.317   | 1 / 5    | 3 / 6                           |                                   |
| Mij (2014)        | 1.000             | 0.025       | 40.276      | 0.000   | 1.000   | 1 / 1    | 4 / 5                           |                                   |
| Meneveau (2018)   | 0.091             | 0.023       | 0.359       | -3.425  | 0.001   | 4 / 17   | 27 / 35                         |                                   |
| Myazaki (2019)    | 1.889             | 0.050       | 72.022      | 0.342   | 0.732   | 0 / 1    | 1 / 9                           |                                   |
| Mbon (2018)       | 0.123             | 0.004       | 3.781       | -1.199  | 0.230   | 0 / 1    | 9 / 12                          |                                   |
| Oh (2019)         | 1.067             | 0.145       | 7.822       | 0.063   | 0.949   | 4 / 9    | 3 / 7                           |                                   |
| Omar (2013)       | 0.556             | 0.013       | 24.513      | -0.304  | 0.761   | 2 / 3    | 1 / 1                           |                                   |
| Pasirja (2017)    | 0.246             | 0.009       | 6.823       | -0.827  | 0.408   | 0 / 11   | 1 / 9                           |                                   |
| Szol (2015)       | 0.500             | 0.013       | 19.562      | -0.371  | 0.711   | 1 / 2    | 2 / 3                           |                                   |
| Overall           | 0.461             | 0.213       | 0.997       | -1.967  | 0.049   | 23 / 100 | 94 / 218                        |                                   |

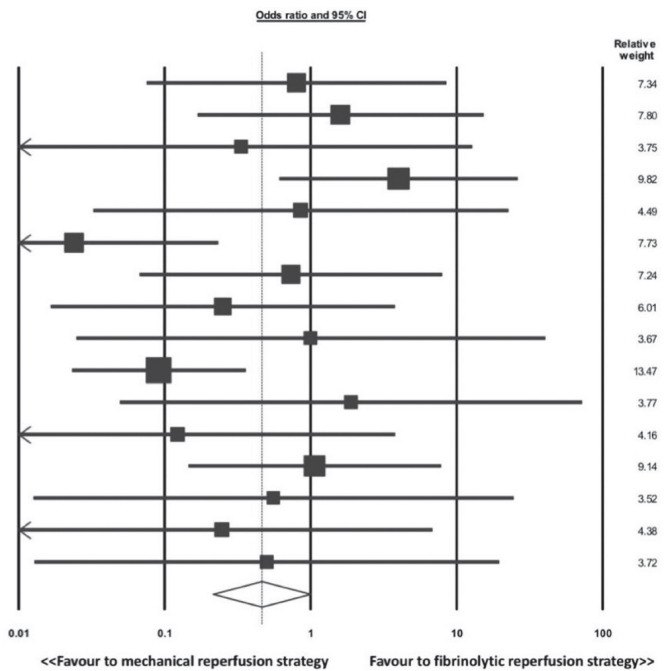

I-squared = 28.3%, p = 0.139

NOTE: Weights are from random effects analysis
